# Supplementary material for: Facile fabrication of magnetically recyclable metal–organic framework nanocomposites for highly efficient and selective catalytic oxidation of benzylic C–H bonds
Source: Royal Society of Chemistry journal article supplement (doi:10.1039/c4cc03728f), 2014-01-01
Supplement: c4cc03728f1.pdf [file c4cc03728f1.pdf]

## Supporting Information

# Facile Fabrication of Magnetically Recyclable Metal-Organic Framework Nanocomposites for Highly Efficient and Selective Catalytic Oxidation of Benzylic C-H Bonds

*Yifa Chen, Xianqiang Huang, Xiaofeng, Jikun Li, Yingyu Huang, Jingshu Zhao, Yuexin Guo, Xinmei Dong, Ruodan Han, Pengfei Qi, Yuzhen Han, Haiwei Li, Changwen Hu\* and Bo Wang\**

### Table of contents

1. Experimental procedures
2. Figure S1. TEM of carboxyl functionalized  $\text{Fe}_3\text{O}_4$
3. Figure S2. The EDS element analysis of  $\text{HKUST-1@Fe}_3\text{O}_4$
4. Figure S3. Selected-area electron diffraction of the shell
5. Figure S4. The PXRD pattern data of  $\text{HKUST-1@Fe}_3\text{O}_4$
6. Figure S5. Pore size distributions of  $\text{HKUST-1}$  and  $\text{HKUST-1@Fe}_3\text{O}_4$
7. S6. The elemental analysis of  $\text{HKUST-1@Fe}_3\text{O}_4$
8. Figure S7. Field-dependent magnetization of  $\text{Fe}_3\text{O}_4$  and  $\text{HKUST-1@Fe}_3\text{O}_4$
9. Figure S8. The PXRD pattern data of  $\text{HKUST-1@Fe}_3\text{O}_4$  after three catalytic cycles
10. S9. Atomic absorption analysis of product solution after three catalytic cycles
- 11 Figure S9. The high-resolution TEM images of  $\text{HKUST-1@Fe}_3\text{O}_4$  and  $\text{Fe}_3\text{O}_4$ .

## Experimental procedures

### *Chemical:*

Polyvinylpyrrolidone K-30 (PVP,  $(C_6H_9HO)_n$ , Mw: av. 40000),  $Cu(OAc)_2 \cdot H_2O$  (98%),  $C_2H_5OH$ , DMF,  $CH_2Cl_2$ , trimesic acid ( $H_3BTC$ , 99%) were purchased from Sinopharm Chemical Reagent Co. Ltd.. Carboxyl functionalized  $Fe_3O_4$  (20 nm) was purchased from Beijing DK Nano S&T. Ltd.. All the reagents used in this work were used as received without further purification.

### *Synchronous Growth of HKUST-1@Fe<sub>3</sub>O<sub>4</sub> Nanocomposites:*

Controllable synthesis of nano-scaled core-shell HKUST-1@ $Fe_3O_4$  with magnetic properties was achieved by one-pot strategy. First, PVP (0.200 g, 0.005 mmol), as surface capping agent, together with  $Cu(OAc)_2 \cdot H_2O$  (0.100 g, 0.500 mmol) were uniformly dissolved in a mixed solution of DMF/ $C_2H_5OH/H_2O$  (1:1:1, 90 mL) in a 150 mL round-bottom flask under mechanical stirring. Then carboxyl functionalized  $Fe_3O_4$  of 20 nm in diameter (0.200 g) were gradually added to the mixed solution with high-speed mechanical stirring of 900 r/min and kept for 10 min. After the addition of trimesic acid (0.300 g, 1.428 mmol) and another 0.100 g  $Cu(OAc)_2 \cdot H_2O$  to the reaction mixture and stirred for further 12h, the product was collected by centrifugation and washed with DMF/ $C_2H_5OH/H_2O$  (1:1:1, 20 mL  $\times$ 3) mixtures and  $C_2H_5OH$  (20 mL  $\times$ 3). After heating at 60°C for 3h, 0.460 g black powder was collected. Then half of the product was for catalysis research, while the rest was treated repeatedly with 20 mL  $CH_2Cl_2$  (3 times) for 24 h and the product was further centrifuged and heated in 150°C for 3h under vacuum for  $N_2$  sorption test and elemental analysis.

### *General Procedure for HKUST-1@Fe<sub>3</sub>O<sub>4</sub> Catalyzed Oxidation of Diphenylmethane:*

25 mg HKUST-1@ $Fe_3O_4$ , diphenylmethane (0.250 mmol, 42.050 mg), 70% TBHP (0.625 mmol, 130.360 mg) were added to a Schlenk Tube. And then 0.5 mL of benzonitrile was added to the mixture. The reaction mixture was subsequently heated at 80°C in a Wattecs Parallel Reactor for 14 h with stirring. After the reaction was completed, the resulting mixture was analyzed by GC-MS and GC.

### *Reuse Experiments:*

The reuse experiments were carried out for the oxidation of diphenylmethane under the conditions listed in Table 1. After the reaction was completed, the catalyst was easily retrieved by magnet, washed and soaked with DMF (ca.  $4 \times 5$  mL) and EtOH (ca.  $3 \times 5$  mL), and air-dried prior to being used for the reuse experiment. The experiment of the third run was prepared in the same way as that for the second run, and finally the 92.9% conversion of diphenylmethane was also determined by GC.

***Characterization:***

Field-emission scanning electron microscopy (FESEM, JEOL, S-4800) was applied to investigate the size and morphology of the samples. For the detailed microstructure study, TEM and HR-TEM images were taken on a JEOL JEM-1200EX microscope. Elemental mapping were carried out under the bright field (BF) mode on a JEOLJEM-2100F microscope. The composition information was conducted by energy dispersive X-ray spectroscopy (EDS) at 20 keV on a TN5400 EDS instrument. Powder X-ray diffraction (XRD) was performed on a Bruker Focus D8 diffractometer with a Cu-K $\alpha$  X-ray radiation source ( $\lambda = 0.154056$  nm). The metal content of the compound HKUST-1@Fe<sub>3</sub>O<sub>4</sub> was measured by inductively coupled plasma (ICP) on a JY-ULTIMA2 analyzer. The FT-IR spectra were recorded from KBr pellets in the range 2000-400 cm<sup>-1</sup> on Nicolet 170 SXFT-IR spectrometer. The GC analyses were performed on Shimadzu GC-2014C with a FID detector equipped with an HP-5ms capillary column. The GC mass spectra were recorded on Agilent 7890A-5975C at an ionization voltage of 1200 V. Field-dependent magnetization curves was performed on Lakeshore 7404 magnetic detector. Atomic absorption analysis was measured by inductively coupled plasma (ICP) on a ICP-6000 analyzer.

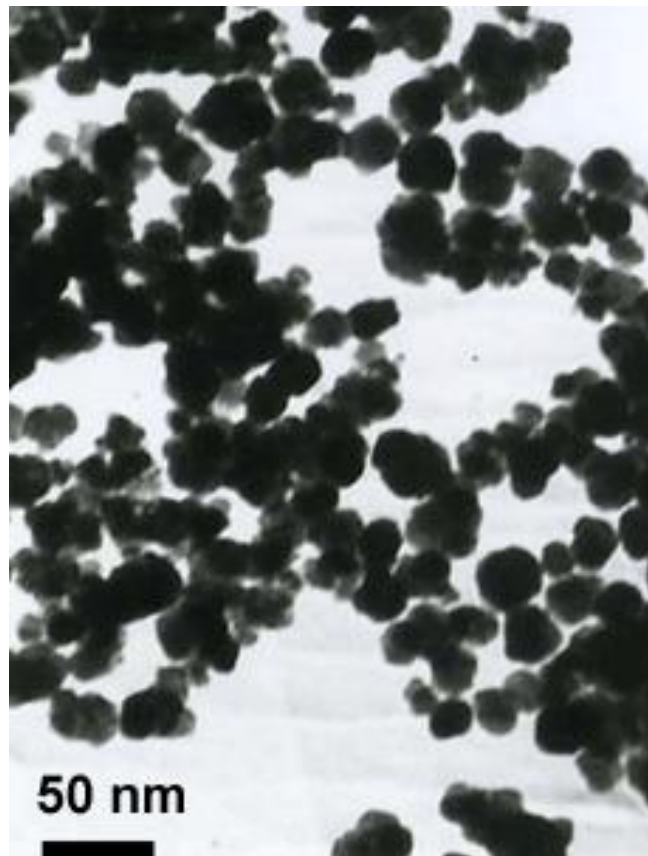

**Figure S1.** TEM of carboxyl functionalized  $\text{Fe}_3\text{O}_4$ .

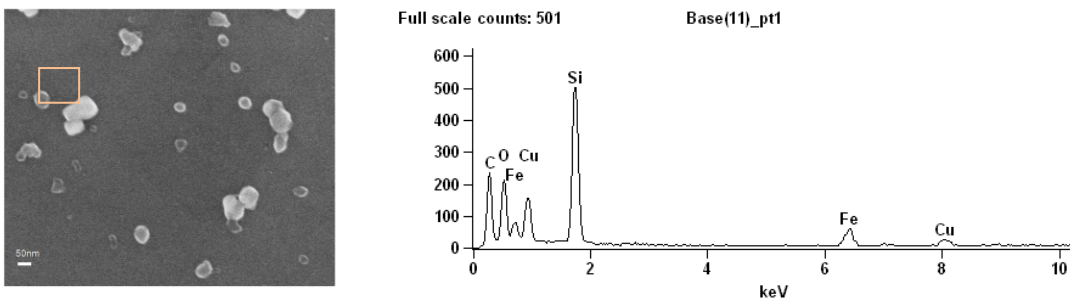

| Element        | Fe    | Cu   | C     | O     | Si    |
|----------------|-------|------|-------|-------|-------|
| Percentage (%) | 11.30 | 9.60 | 15.56 | 19.61 | 41.94 |

**Figure S2.** The EDS element analysis of  $\text{HKUST-1}@Fe_3O_4$ , the scale bar is 50 nm.

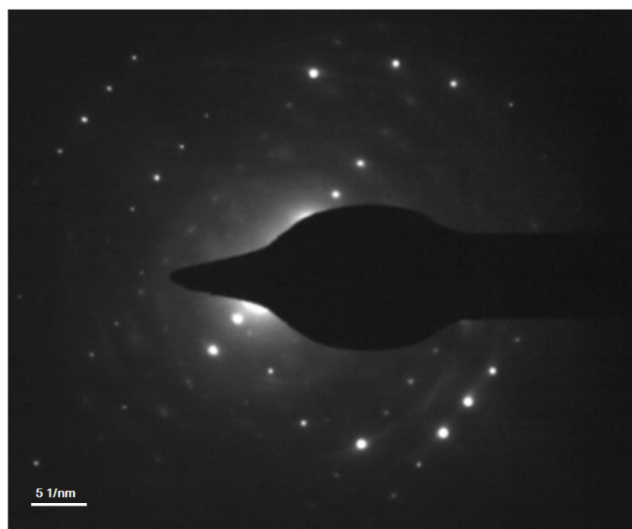

**Figure S3.** Selected-area electron diffraction of the shell.

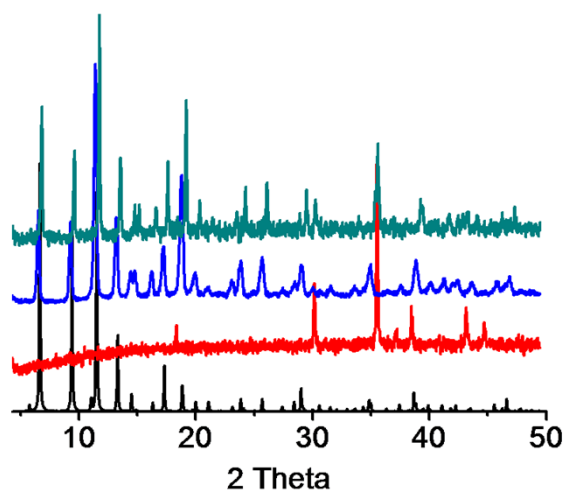

**Figure S4.** PXRD patterns of simulated HKUST-1 (black),  $\text{Fe}_3\text{O}_4$  (red), HKUST-1 (blue) and HKUST-1@ $\text{Fe}_3\text{O}_4$  (cyan).

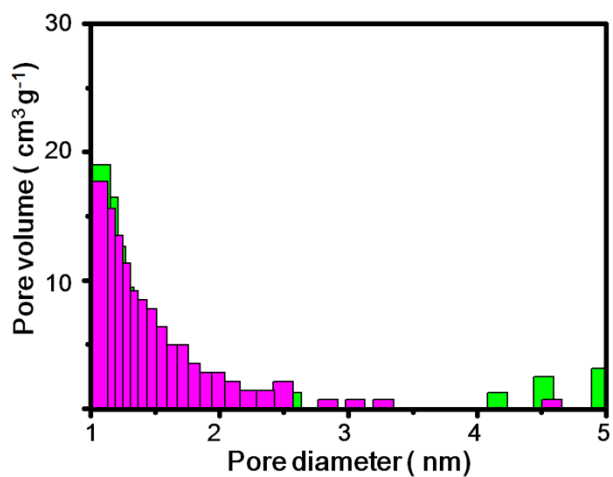

**Figure S5.** Pore size distributions of HKUST-1 (green) and HKUST-1@Fe<sub>3</sub>O<sub>4</sub> (pink).

**S6.** The elemental analysis of HKUST-1@Fe<sub>3</sub>O<sub>4</sub>

| Element             | Cu    | Fe    | C     | H    |
|---------------------|-------|-------|-------|------|
| Mass Percentage (%) | 19.34 | 28.63 | 21.72 | 3.41 |
| Calculated Data     | 18.98 | 28.78 | 21.35 | 1.86 |

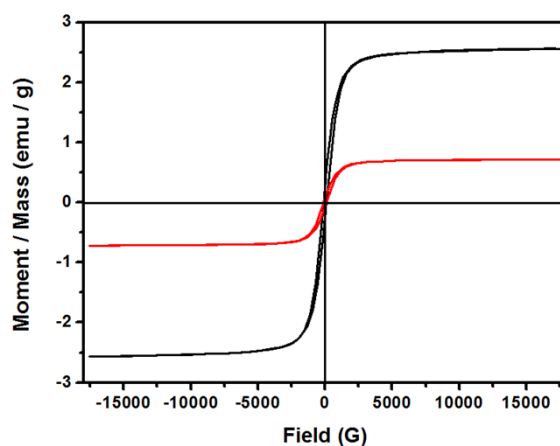

**Figure S7.** Field-dependent magnetization curves of Fe<sub>3</sub>O<sub>4</sub> (black) and HKUST-1@Fe<sub>3</sub>O<sub>4</sub> (red) at 293 K.

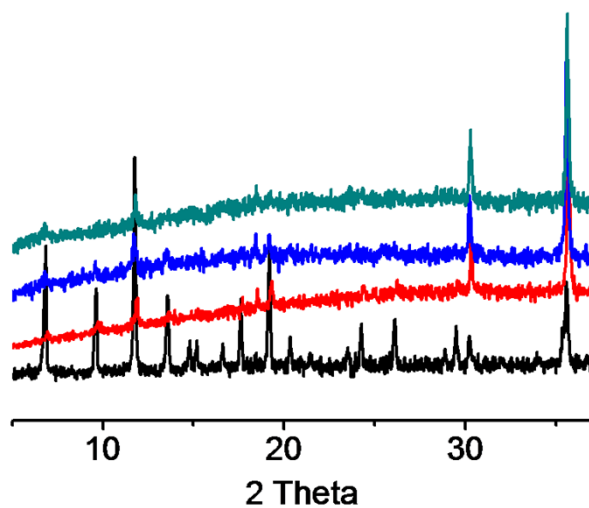

**Figure S8.** PXRD patterns of HKUST-1@Fe<sub>3</sub>O<sub>4</sub> after catalysis. Black, as-synthesized HKUST-1@Fe<sub>3</sub>O<sub>4</sub>; red, first cycle; blue, second cycle; cyan, third cycle.

**S9.** Atomic absorption analysis of product solution after three catalytic cycles

The detection limit of the inductively coupled plasma (ICP) analyzer (ICP-6000) is 1 mg/L and the analysis results of copper and iron ions are both below the detection limit.

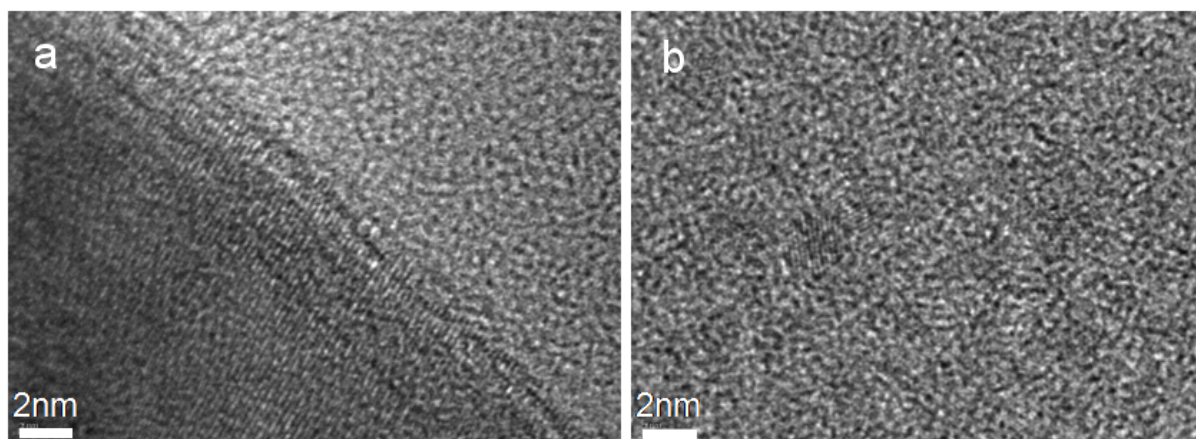

**Figure S9.** The high-resolution TEM images of HKUST-1@Fe<sub>3</sub>O<sub>4</sub> (a) and Fe<sub>3</sub>O<sub>4</sub> (b).
